# Supplementary material for: Development and psychometric testing of the clinical networks engagement tool
Source: PubMed Central journal article supplement (PMC5369681; doi:10.1371/journal.pone.0174056), 2017-03-28
Supplement: pone.0174056.s001.pdf [file pone.0174056.s001.pdf]

# S1 File. Original Item Descriptive Statistics and Exploratory Factor Analysis, and Item Not Applicable Responses by Governance Level

## Table A Item Descriptive Statistics

| Items                    | M    | SD   | Missing % | N/A % |
|--------------------------|------|------|-----------|-------|
| <b>Global engagement</b> |      |      |           |       |
| Q1. glob_prio            | 2.62 | 1.32 | 0.9       | -     |
| Q2. glob_plan            | 2.70 | 1.33 | 0.2       | -     |
| Q3. glob_impl            | 2.77 | 1.42 | 1.2       | -     |
| Q4. glob_eval            | 2.46 | 1.37 | 1.4       | -     |
| <b>Inform</b>            |      |      |           |       |
| Q5. inf_prio             | 3.91 | 1.18 | 0.9       | 3.3   |
| Q6. inf_plan             | 3.50 | 1.27 | 0.5       | 3.5   |
| Q7. inf_impl             | 3.51 | 1.26 | 0.9       | 3.8   |
| Q8. inf_eval             | 3.35 | 1.25 | 1.4       | 3.1   |
| Q9. inf_a                | 3.44 | 1.23 | 0.9       | 5.4   |
| Q10. inf_b               | 3.33 | 1.23 | 0.7       | 5.2   |
| Q11. inf_c               | 3.38 | 1.16 | 0.7       | 7.5   |
| <b>Consult</b>           |      |      |           |       |
| Q12. cons_prio           | 3.47 | 1.31 | 1.2       | 8.5   |
| Q13. cons_plan           | 3.22 | 1.23 | 1.7       | 6.8   |
| Q14. cons_impl           | 3.25 | 1.25 | 2.1       | 8.0   |
| Q15. cons_eval           | 3.14 | 1.23 | 2.1       | 7.8   |
| Q16. cons_a              | 3.58 | 1.28 | 2.1       | 6.4   |
| Q17. cons_b              | 3.63 | 1.18 | 1.7       | 11.1  |
| Q18. cons_c              | 3.11 | 1.21 | 2.1       | 10.4  |
| Q19. cons_d              | 3.20 | 1.13 | 2.4       | 18.4  |
| <b>Involve</b>           |      |      |           |       |
| Q20. invo_prio           | 3.30 | 1.21 | 2.1       | 13.4  |
| Q21. invo_plan           | 3.32 | 1.20 | 2.6       | 12.0  |

|                    |           |                                                                                                                                            |      |      |     |      |
|--------------------|-----------|--------------------------------------------------------------------------------------------------------------------------------------------|------|------|-----|------|
| Q22.               | invo_impl | The SCN has worked with me to ensure my concerns and issues have been consistently understood and considered for implementing SCN projects | 3.31 | 1.18 | 2.6 | 12.3 |
| Q23.               | invo_eval | The SCN has worked with me to ensure my concerns and issues have been consistently understood and considered for evaluating SCN projects   | 3.24 | 1.18 | 3.3 | 13.7 |
| Q24.               | invo_a    | My concerns and issues have been directly reflected in the alternatives developed for SCN projects                                         | 3.23 | 1.10 | 2.4 | 17.9 |
| Q25.               | invo_b    | I have been provided with information about how my concerns and issues influenced decisions about SCN projects                             | 3.08 | 1.12 | 3.1 | 16.3 |
| Q26.               | invo_c    | My concerns and issues have been adequately considered in SCN decision making                                                              | 3.23 | 1.12 | 3.5 | 16.7 |
| <b>Collaborate</b> |           |                                                                                                                                            |      |      |     |      |
| Q27.               | coll_prio | The SCN partnered with me throughout the processes of setting SCN priorities                                                               | 3.28 | 1.27 | 3.1 | 11.6 |
| Q28.               | coll_plan | The SCN partnered with me throughout the processes of planning SCN projects                                                                | 3.35 | 1.22 | 2.6 | 10.4 |
| Q29.               | coll_impl | The SCN partnered with me throughout the processes of implementing SCN projects                                                            | 3.33 | 1.21 | 2.8 | 12.0 |
| Q30.               | coll_eval | The SCN partnered with me throughout the processes of evaluating SCN projects                                                              | 3.20 | 1.19 | 3.5 | 13.0 |
| Q31.               | coll_a    | I have been involved in each aspect of SCN decision making                                                                                 | 2.80 | 1.20 | 3.5 | 9.0  |
| Q32.               | coll_b    | I have had an opportunity to develop alternatives for SCN projects                                                                         | 3.04 | 1.21 | 3.5 | 11.3 |
| Q33.               | coll_c    | I have had an opportunity to identify a preferred solution for SCN projects                                                                | 3.18 | 1.22 | 4.0 | 10.4 |
| Q34.               | coll_d    | My alternatives and recommendations have been incorporated into SCN decisions to a large extent                                            | 3.03 | 1.14 | 4.2 | 12.3 |
| <b>Empower</b>     |           |                                                                                                                                            |      |      |     |      |
| Q35.               | empو_prio | I have been given final decision-making authority about SCN priorities                                                                     | 2.19 | 1.10 | 3.5 | 22.4 |
| Q35.               | empو_plan | I have been given final decision-making authority about how SCN projects are planned                                                       | 2.23 | 1.11 | 3.5 | 22.2 |
| Q37.               | empو_impl | I have been given final decision-making authority about how SCN projects are implemented                                                   | 2.27 | 1.12 | 3.8 | 21.5 |
| Q38.               | empو_eval | I have been given final decision-making authority about how SCN projects are evaluated                                                     | 2.25 | 1.08 | 4.0 | 21.2 |
| Q39.               | empو_a    | Decisions I made about SCN projects have been implemented to a large extent                                                                | 3.04 | 1.11 | 6.6 | 20.3 |
| Q40.               | empو_b    | I am accountable for the decisions made about SCN projects                                                                                 | 3.01 | 1.31 | 3.8 | 19.6 |

Note: N/A – not applicable.

**Table B. Original Exploratory Factor Analysis**

| Items and Subscales | Rotated Factor Loadings |             |             |             |             |              |
|---------------------|-------------------------|-------------|-------------|-------------|-------------|--------------|
|                     | 1                       | 2           | 3           | 4           | 5           | 6            |
| 1. Involve          |                         |             |             |             |             |              |
| invo_prio           | <b>0.54</b>             | 0.21        | 0.02        | 0.02        | 0.27        | 0.11         |
| invo_plan           | <b>0.64</b>             | 0.17        | 0.02        | 0.02        | 0.23        | 0.13         |
| invo_impl           | <b>0.63</b>             | 0.08        | 0.06        | 0.08        | 0.27        | 0.14         |
| invo_eval           | <b>0.57</b>             | 0.09        | 0.10        | 0.08        | 0.29        | 0.13         |
| coll_prio           | <b>0.72</b>             | 0.06        | 0.02        | 0.01        | 0.09        | -0.10        |
| coll_plan           | <b>0.79</b>             | -0.05       | 0.03        | 0.07        | 0.06        | -0.17        |
| coll_impl           | <b>0.81</b>             | -0.14       | 0.07        | 0.11        | 0.08        | -0.12        |
| coll_eval           | <b>0.77</b>             | -0.12       | 0.11        | 0.06        | 0.06        | -0.17        |
| coll_a              | <b>0.58</b>             | 0.23        | 0.20        | 0.05        | -0.08       | -0.03        |
| coll_b              | <b>0.70</b>             | 0.19        | 0.13        | -0.01       | -0.14       | -0.06        |
| coll_c              | <b>0.65</b>             | 0.17        | 0.14        | 0.03        | -0.04       | -0.03        |
| coll_d              | <b>0.46</b>             | 0.16        | 0.26        | 0.03        | 0.06        | 0.04         |
| 2. Inform           |                         |             |             |             |             |              |
| inf_prio            | 0.00                    | <b>0.81</b> | 0.01        | 0.00        | 0.05        | -0.01        |
| inf_plan            | 0.05                    | <b>0.85</b> | -0.01       | 0.10        | -0.05       | 0.02         |
| inf_impl            | -0.08                   | <b>0.79</b> | 0.11        | 0.20        | -0.02       | 0.01         |
| inf_eval            | -0.10                   | <b>0.69</b> | 0.09        | 0.24        | 0.06        | -0.05        |
| inf_a               | 0.07                    | <b>0.79</b> | 0.02        | -0.05       | 0.04        | -0.09        |
| inf_b               | 0.14                    | <b>0.73</b> | 0.07        | -0.05       | 0.02        | -0.08        |
| inf_c               | 0.03                    | <b>0.50</b> | 0.02        | -0.09       | 0.23        | -0.12        |
| cons_a              | 0.15                    | <b>0.49</b> | 0.01        | 0.05        | 0.11        | -0.23        |
| 3. Empower          |                         |             |             |             |             |              |
| empo_prio           | 0.00                    | 0.02        | <b>0.96</b> | -0.02       | -0.02       | -0.02        |
| empo_plan           | 0.01                    | 0.00        | <b>0.98</b> | 0.01        | -0.03       | -0.03        |
| empo_impl           | 0.00                    | 0.00        | <b>0.99</b> | 0.02        | -0.03       | 0.00         |
| empo_eval           | 0.03                    | 0.01        | <b>0.97</b> | 0.01        | -0.05       | 0.00         |
| empo_a              | 0.16                    | 0.02        | <b>0.44</b> | -0.08       | 0.31        | 0.07         |
| empo_b              | 0.08                    | 0.05        | <b>0.46</b> | 0.01        | 0.29        | 0.03         |
| 4. Global           |                         |             |             |             |             |              |
| glob_prio           | 0.13                    | 0.30        | -0.13       | <b>0.48</b> | -0.03       | 0.03         |
| glob_plan           | 0.15                    | 0.12        | -0.09       | <b>0.73</b> | -0.05       | 0.03         |
| glob_impl           | -0.02                   | -0.05       | 0.07        | <b>0.83</b> | 0.01        | -0.01        |
| glob_eval           | -0.08                   | -0.06       | 0.04        | <b>0.90</b> | 0.07        | -0.06        |
| 5. Considered       |                         |             |             |             |             |              |
| cons_b              | -0.08                   | 0.16        | 0.04        | 0.02        | <b>0.68</b> | -0.19        |
| cons_c              | -0.02                   | 0.04        | 0.08        | 0.06        | <b>0.68</b> | -0.27        |
| cons_d              | -0.04                   | 0.04        | 0.04        | 0.06        | <b>0.72</b> | -0.09        |
| invo_a              | 0.28                    | 0.02        | 0.08        | 0.04        | <b>0.63</b> | 0.14         |
| invo_b              | 0.26                    | 0.01        | 0.06        | -0.01       | <b>0.68</b> | 0.08         |
| invo_c              | 0.28                    | 0.04        | 0.00        | 0.02        | <b>0.71</b> | 0.17         |
| 6. Consult          |                         |             |             |             |             |              |
| cons_prio           | 0.27                    | <b>0.40</b> | -0.09       | -0.06       | 0.10        | <b>-0.40</b> |
| cons_plan           | 0.26                    | 0.29        | -0.03       | 0.09        | 0.09        | <b>-0.52</b> |
| cons_impl           | 0.17                    | 0.19        | 0.09        | 0.13        | 0.14        | <b>-0.54</b> |
| cons_eval           | 0.20                    | 0.16        | 0.10        | 0.11        | 0.12        | <b>-0.58</b> |
| Eigenvalue          | 20.54                   | 4.02        | 2.12        | 1.83        | 1.40        | 1.05         |
| % of variance       | 51.34                   | 10.05       | 5.31        | 4.56        | 3.50        | 2.63         |
| Cronbach's $\alpha$ | 0.97                    | 0.94        | 0.95        | 0.87        | 0.93        | 0.94         |

Note: 77.4% of the variance explained; rotation converged in 17 iterations; bold font indicates item factor loadings.

**Table C Item *Not Applicable* Responses by Governance Level**

| Item      | Leaders  |      | Members  |      | Support  |      | Stakeholders |      | $X^2$ (3)          | <i>p</i> |
|-----------|----------|------|----------|------|----------|------|--------------|------|--------------------|----------|
|           | <i>n</i> | %    | <i>n</i> | %    | <i>n</i> | %    | <i>n</i>     | %    |                    |          |
| inf_prio  | 2        | 2.8  | 3        | 1.3  | 3        | 6.1  | 6            | 9.4  | 11.61 <sup>a</sup> | .006     |
| inf_plan  | 2        | 2.8  | 3        | 1.3  | 3        | 6.0  | 7            | 10.8 | 14.43 <sup>a</sup> | .002     |
| inf_impl  | 2        | 2.8  | 4        | 1.7  | 3        | 6.0  | 7            | 10.8 | 12.25 <sup>a</sup> | .014     |
| inf_eval  | 2        | 2.8  | 2        | 0.9  | 3        | 6.0  | 6            | 9.5  | 13.96 <sup>a</sup> | .002     |
| invo_prio | 6        | 8.7  | 24       | 10.3 | 10       | 20.0 | 17           | 27.4 | 15.32              | .002     |
| invo_plan | 5        | 7.1  | 23       | 10.0 | 7        | 14.0 | 16           | 25.8 | 13.47 <sup>a</sup> | .003     |
| invo_impl | 3        | 4.3  | 24       | 10.4 | 9        | 18.0 | 16           | 25.8 | 16.57 <sup>a</sup> | .007     |
| invo_eval | 4        | 5.7  | 25       | 10.9 | 13       | 27.1 | 16           | 25.8 | 19.69 <sup>a</sup> | < .001   |
| empو_prio | 10       | 14.5 | 39       | 16.9 | 25       | 52.1 | 21           | 34.4 | 34.87              | < .001   |
| empو_plan | 10       | 14.5 | 38       | 16.5 | 24       | 50.0 | 22           | 35.5 | 33.50              | < .001   |
| empو_impl | 9        | 13.0 | 37       | 16.1 | 23       | 47.9 | 22           | 36.1 | 33.38              | < .001   |
| empو_eval | 9        | 13.0 | 37       | 16.2 | 22       | 45.8 | 22           | 36.1 | 30.59              | < .001   |

Note: <sup>a</sup> Fisher's exact test
