# Supplementary material for: Development and psychometric testing of the clinical networks engagement tool
Source: PubMed Central journal article supplement (PMC5369681; doi:10.1371/journal.pone.0174056), 2017-03-28
Supplement: pone.0174056.s002.pdf [file pone.0174056.s002.pdf]

## **S2 File. Final Clinical Networks Engagement Tool**

Welcome!

You are important to the **Strategic Clinical Network(s) (SCN)** and their work.

As part of a larger study about SCN effectiveness, we are conducting a study to understand engagement in SCNs across Alberta. We want to know about your level of engagement in SCN projects, how the SCN has engaged you, and your beliefs about engaging in SCN projects.

### **IMPORTANT:**

- Your participation in this questionnaire is voluntary.
- By submitting the questionnaire, your participation implies consent. Results will be reported in aggregate form so that individual results will not be directly identifiable.
- All data will be stored at the University of Calgary and will only be accessible to this study's researchers.

### **Questionnaire:**

- The questionnaire will take approximately 15-20 minutes to complete. Some of the questions may seem to be repeated.
- There are slight differences in wording that are intended to help us understand what individuals think about engagement.

Thank you so much for your time!
